# Supplementary material
Source: Springer Nature journal article supplement (https://www.springermedizin.de/resource/supplementary/13098_2013_290_MOESM1_ESM.docx/9670990)
Supplement: MOESM1 [file 9670990]

Figure 1


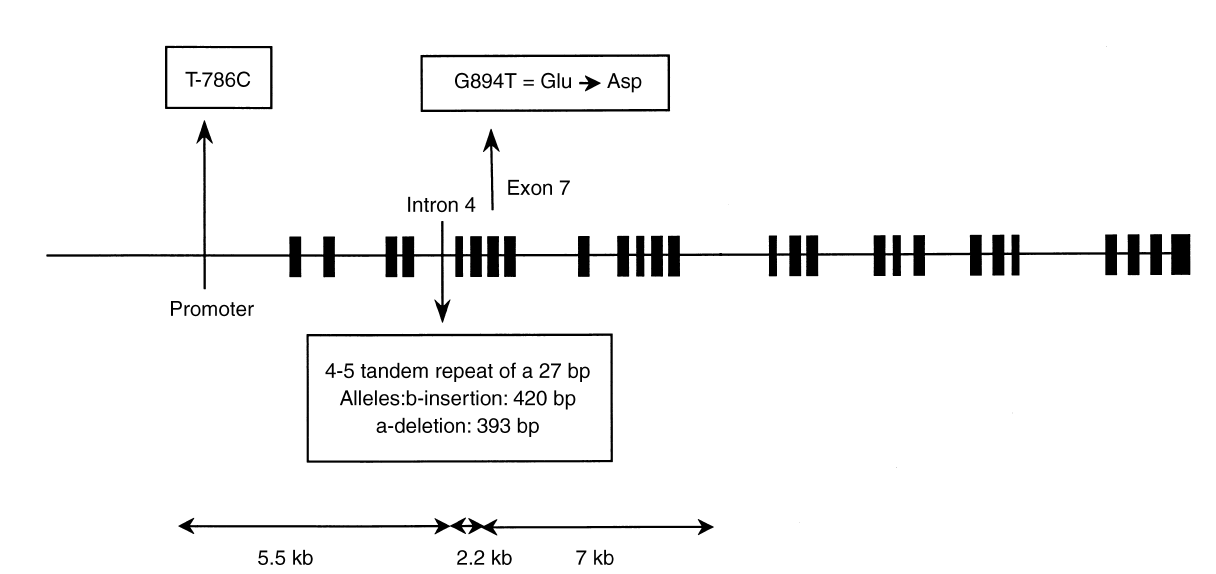


Figure 1 **-** eNOS gene and the three most studied polymorphisms. (Adapted from reference [[58](#_ENREF_58)])
